# Supplementary material for: Shaking the Tree: Multi-locus Sequence Typing Usurps Current Onchocercid (Filarial Nematode) Phylogeny
Source: PLoS Negl Trop Dis. 2015 Nov 20;9(11):e0004233. doi: 10.1371/journal.pntd.0004233 (PMC4654488; doi:10.1371/journal.pntd.0004233)
Supplement: S1 Table — The species were classified by subfamilies indicated in the first column. The name of the species as well as the author(s) and date are given in the second column. Columns 3 to 8 present species information, i.e. family host, order host, localisation in the host, genera vector, family vector and geographical distribution. The references of morphological studies on which species identifications were based are listed in the last column. For the most part of the sampling some supplementary information were based on Anderson et al. [9]. (XLSX) [file pntd.0004233.s002.xlsx]

## Sheet: Feuil1
Subfamilies	Species	Family Host	Order Host	Localisation in host	Genera Vector	Family Vector	geographic dictribution	reference
Oswaldofilariinae	Oswaldofilaria chabaudi Pereira, Souza & Bain, 2010	Tropiduridae	Squamata	muscular aponeuroses, body cavity	ND	ND	Neotropical	[26]
	Oswaldofilaria petersi Bain & Sulahian 1974	Teiidae	Squamata	mesentery, intestin wall, aponeurosis	Culex	Culicidae	Neotropical	[27;28]
Waltonellinae	Ochoterenella sp.1	Bufonidae	Anura	mesentery	ND	ND	Neotropical	work in progress
	Ochoterenella sp.2	Bufonidae	Anura	mesentery	ND	ND	Neotropical	work in progress
	Ochoterenella sp.3	Hylidae	Anura	subcutanous aponeurosis	ND	ND	Neotropical	work in progress
Icosiellinae	Icosiella neglecta (Diesing, 1851)	Anguidae, Ranidae	Anura	subcutanous aponeurosis	Sycorax, Forcipomyia	Psychodidae, Ceratopogonidae	Paleartic	[29]
Setariinae	Setaria labiatopapillosa (Alessandrini, 1848)	Bovidae, Suidae, Cervidae, Giraffidae, Camelidae, Equidae	Artiodactyla	peritoneal cavity	Aedes, Anopheles, Mansonia	Culicidae	cosmopolitan	[9;59]
	Setaria tundra Bain, 1974	Cervidae	Artiodactyla	abdominal cavity	Aedes, Anopheles	Culicidae	Nearctic, Paleartic	[30]
Dirofilarrinae	Pelecitus fulicaeatrae (Diesing, 1861)	Podicipedidae, Rallidae	Gruiformes, Podicipediformes	tendons	Pseudomenopon	Menoponidae	Nearctic, Paleartic, Ethiopian	[31]
	Dirofilaria (Dirofilaria) immitis (Leidy, 1856)	Canidae, felidae, Otariidae, Mustelidae, Ursidae, Castoridae, Procyonidae, Leporidae, Cervidae, Equidae, Hominidae, microtidae	Carnivora, Primates, Artiodactyla, Lagomorpha, Rodentia, Perissodactyla	heart	Aedes, Anopheles, Mansonia, Culex	Culicidae	cosmopolitan	[32]
	Dirofilaria (Nochtiella) repens Railliet & Henry, 1911	felidae, canidae	Carnivora	subcutanous connective tissues	Aedes, Anopheles, Mansonia, Culex	Culicidae	cosmopolitan	[9;32]
	Foleyella candezei (Fraipont, 1882)	Agamidae, Chameleonidae	Squamata	subcutanous and perimuscular	Anopheles, Aedes	Culicidae	Paleartic, Ethiopian	[9]
	Loa loa (Cobbold, 1864)	Hominidae	Primates	subcutanous, serous connective tissue	Chrysops, Haematopota, Hippocentrum	Tabanidae	Ethiopian	[32]
Splendidofilariinae	Aproctella alessandroi Bain, Petit, Kosek & Chabaud, 1981	Thraupidae	Passeriformes	body cavity	Aedes togoi (Culicidae)	Culicidae	Neotropical	[33]
	Cardiofilaria pavlovskyi Storm, 1937	Oriolidae, Corvidae	Passeriformes	body and pericardial cavity	ND	ND	Paleartic, Neotropical	[34]
	Madathamugadia hiepei Hering-Hagenbeck et al., 2000	Gekkonidae	Squamata	Peritoneal wall	Phlebotomus	Psychodidae	Ethiopian	[35]
	Rumenfilaria andersoni Lankester & Snider, 1982	Cervidae	Artiodactyla	ruminal subserosal lymphatic vessel	ND	ND	Nearctic, paleartic	[36]
	Wuchereria bancrofti (Cobbold, 1877)	Hominidae	Primates	lymphatic system	Aedes, Anopheles, Culex and Mansonia	Culicidae	cosmopolitan	[32]
Onchocercinea	Acanthocheilonema odendhali (Perry, 1967)	Otariidae	Carnivora	intermuscular fascia and thoracic and abdominal cavities	ND	ND	Nearctic	[37]
	Acanthocheilonema viteae (Krepkogorskaya, 1933)	Gerbillidae	Rodentia	subcutanous tissues of back	Ornithodoros , Rhipicephalus	Ixodida	Palaeartic	[32]
	Breinlia (Breinlia) jittapalapongi (Ribas et al, submitted)	Muridae	Rodentia	thoracic and abdominal cavities	ND	ND	ND	[38]
	Brugia malayi (Brug, 1927)	Hominidae , canidae, felidae, viverridae, Manidae.	Primates, carnivora, Pholidota	Lymphatic vessel and ganglions	Mansonia, Anopheles, Aedes	Culicidae	Paleartic, oriental	[32]
	Brugia pahangi (Buckley & Edeson, 1956)	Cebidae, Erinaceidae, Felidae, Lorisidae, Manidae, Scuiridae, Viverridae	Primates ,Pholidota , Rodentia, Erinaceomorpha, carnivora	Lymphatic vessel and ganglions	Mansonia , Anopheles , Armigeres , Psorophora , Culex, Aedes	Culicidae	Oriental	[32]
	Brugia timori Partono, 1977	Hominidae	Primates	testes, close lung and heart	Aedes , Anopheles	Culicidae	Oriental	[39]
	Cercopithifilaria bainae Almeida & Vicente, 1984	Canidae	Carnivora	subcutanous connective tissues	Rhipicephalus	Ixodida	Paleartic, Neotropical	[40]
	Cercopithifilaria rugosicauda (Böhm & Supperer, 1953)	Cervidae	Artiodactyla	subcutanous connective tissues	Ixodes	Ixodida	Paleartic	[41]
	Cruorifilaria tuberocauda Eberhard, Morales & Orihel , 1976	Caviidae	Rodentia	blood vessels of kidney, lungs, and hear	ND	ND	Neotropical	[42]
	Dipetalonema caudispina (Molin, 1858)	Cebidae	Primates	body cavity	Culicoides	Ceratopogonidae	Neotropical	[43]
	Dipetalonema gracile (Rudolphi, 1809)	Cebidae, Callitrichidae, Cercopithecidae	Primates	abdominal cavity	Culicoides	Ceratopogonidae	Neotropical	[44]
	Dipetalonema graciliformis (Freitas, 1964)	Cebidae	Primates	abdominal cavity	ND	ND	Neotropical	[44]
	Dipetalonema robini Petit, Bain & Roussilhon, 1985	Atelidae, Cebidae	Primates	abdominal cavity	ND	ND	Neotropical	[45]
	Litomosoides brasiliensis Lins de Almeida, 1936	Phyllostomidae	Chiroptera	body cavity	ND	ND	Neotropical	[46]
	Litomosoides hamletti Sandground, 1934	Phyllostomidae	Chiroptera	body cavity	ND	ND	Neotropical	[46]
	Litomosoides sigmodontis Chandler, 1931	Cricetidae	Rodentia	body cavity	Ornithonyssus	Macronyssidae	Nearctic	[46;59]
	Litomosoides solarii Guerrero, Martin, Gardner & Bain, 2002	Phyllostomidae	Chiroptera	body cavity	ND	ND	Neotropical	[46]
	Loxodontofilaria caprini Uni & Bain, 2006	Bovidae	Artiodactyla	subcutanous connective tissues	ND	ND	Paleartic	[47]
	Mansonella (Cutifilaria) perforata Uni, Bain & Takaoka, 2004	Cervidae	Artiodactyla	skin, mainly of the posterior back	ND	ND	Paleartic	[48]
	Mansonella (Mansonella) ozzardi (Manson, 1897)	Hominidae	Primates	subcutanous tissues	Culicoides , Simulium	Ceratopogonidae, Simuliidae	Neotropical	[9]
	Monanema martini Bain, Bartlett & Petit, 1986	Muridae	Rodentia	cecum or large intestine wall	Hyalomma, Rhipicephalus	Ixodida	Ethiopian	[49]
	Onchocerca armillata Railliet and Henry, 1909	Bovidae	Artiodactyla	areolar tissues	Culicoides	Ceratopogonidae	Ethiopian, Oriental	[52]
	Onchocerca dewittei japonica Uni, Bain & Takaoka, 2001	Suidae	Artiodactyla	connective and adipose tissues of limbs and footpads	Simulium	Simuliidae	Paleartic	[50;51]
	Onchocerca eberhardi Uni & Bain, 2007	Cervidae	Artiodactyla	carpal ligament	Simulium	Simuliidae	Paleartic	[50;53]
	Onchocerca flexuosa (Weld, 1856)	Cervidae	Artiodactyla	nodule in dorsal subcutanous tissues	Culicoides	Ceratopogonidae	Paleartic	[54]
	Onchocerca gutturosa Neumann, 1910	Bovidae, Equidae and Camelidae	Artiodactyla	areolar tissue of cervical ligament of knee and trochanter	Simulium, Culicoides	Simuliidae, Ceratopogonidae	cosmopolitan	[55]
	Onchocerca ochengi Bwangamoi, 1969	Bovidae	Artiodactyla	ventral intradermal nodule	Simulium	Simuliidae	Ethiopian	[52]
	Onchocerca skrjabini Ruklyadev, 1964	Bovidae	Artiodactyla	tendons	Simulium	Simuliidae	Paleartic	[56]
	Onchocerca volvulus (Leuckart, 1893)	Hominidae, Atelidae	Primates	nodule in subcutanous connective tissues	Simulium	Simuliidae	Ethiopian and Neotropical	[57]
	Yatesia hydrochoerus (Yates, 1980)	Caviidae	Rodentia	intermuscular connective tissues	Amblyomma	Ixodida	Neotropical	[58]
